# Supplementary material for: Ultrasensitive and turn-on homogeneous Hg2+ sensing based on a target-triggered isothermal cycling reaction and dsDNA-templated copper nanoparticles
Source: Royal Society of Chemistry journal article supplement (doi:10.1039/d1ay00880c), 2021-01-01
Supplement: d1ay00880c1.pdf [file d1ay00880c1.pdf]

# Supporting Information

## **Ultrasensitive and turn-on homogeneous Hg<sup>2+</sup> sensing based on target-triggered isothermal cycling reaction and dsDNA-templated copper nanoparticles**

Qingli Chai<sup>a</sup>, Yuqi Wan<sup>a</sup>, Yanyun Zou<sup>a</sup>, Ting Zhu<sup>a</sup>, Ningxing Li<sup>b</sup>, Jinyang Chen<sup>a\*</sup>,  
Guosong Lai<sup>a</sup>

*<sup>a</sup>Hubei Key Laboratory of Pollutant Analysis & Reuse Technology, Department of Chemistry, Hubei Normal University, Huangshi 435002, PR China*

*<sup>b</sup>College of Chemistry and Chemical Engineering, Hunan University, Changsha 410082, PR China*

*\*Corresponding author. E-mail: chenjy@hbnu.edu.cn*

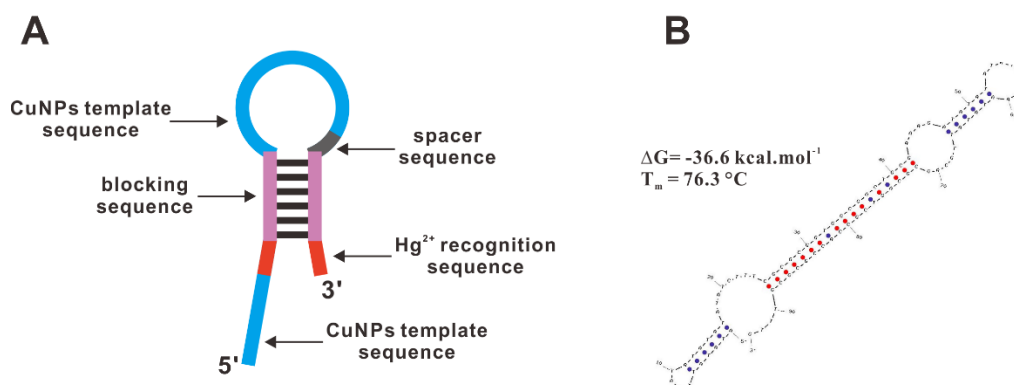

**Fig. S1.** (A) Design of hairpin DNA structure. (B) Simulation diagram of hairpin structure of hairpin DNA probe with OligoAnalyzer Tool. Oligo concentration: 1.0  $\mu\text{M}$ , Na<sup>+</sup> concentration: 100 mM, Mg<sup>2+</sup> concentration: 2 mM.

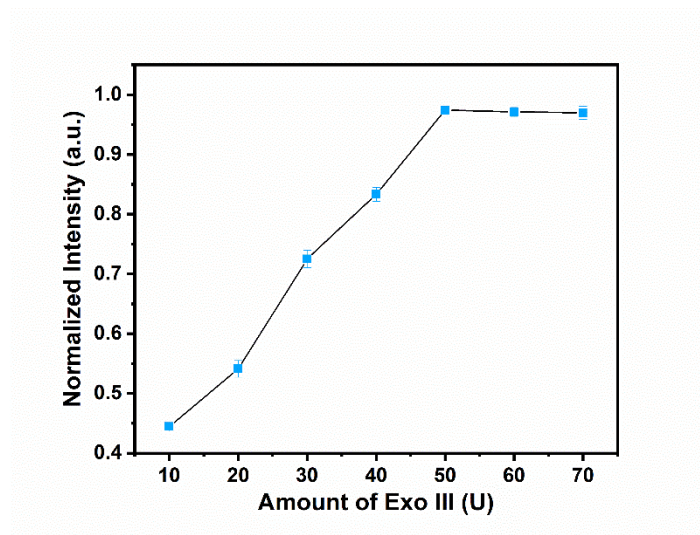

**Fig. S2.** Effects of the amount of Exo III on the fluorescence signal of the sensor for Hg<sup>2+</sup> detection. Hg<sup>2+</sup> concentration: 100 nM.

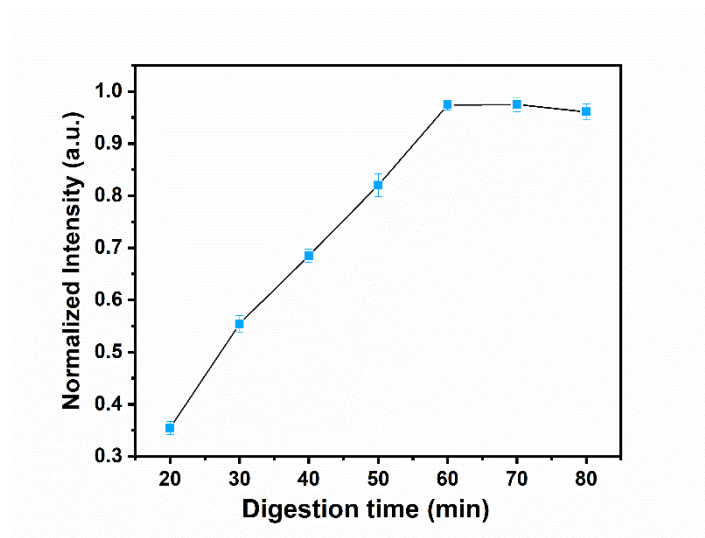

**Fig. S3.** Effects of the digestion time on the fluorescence signal of the sensor for  $\text{Hg}^{2+}$  detection.  $\text{Hg}^{2+}$  concentration: 100 nM.

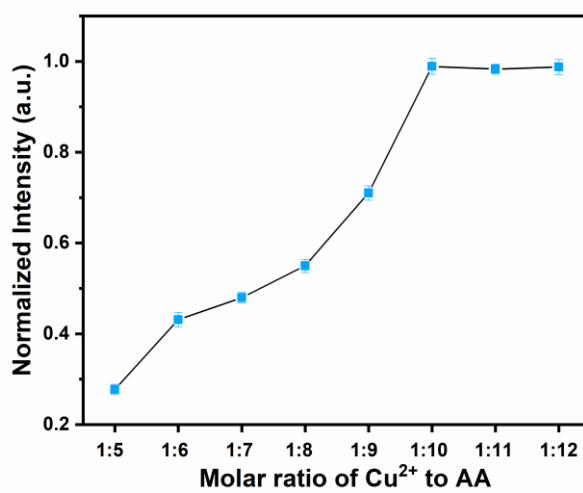

**Fig. S4.** Effects of the molar ratio of  $\text{Cu}^{2+}$  to AA on the fluorescence signal of the sensor for  $\text{Hg}^{2+}$  detection.  $\text{Hg}^{2+}$  concentration: 100 nM.

**Table S1. Comparison of the method for Hg<sup>2+</sup> detection in this work with some previously reported strategies.**

| <b>Method</b>       | <b>Linear range</b>   | <b>LOD</b>    | <b>Reference</b> |
|---------------------|-----------------------|---------------|------------------|
| Fluorescence        | 1.0 nM ~ 60 nM        | 0.39 nM       | [1]              |
| Fluorescence        | 0 ~ 6 μM              | 42 nM         | [2]              |
| Fluorescence        | 0.10 nM ~ 1.0 μM      | 0.03 nM       | [3]              |
| Fluorescence        | 0 ~ 4.5 μM            | 7.0 nM        | [4]              |
| Fluorescence        | 0.5 μM ~ 64 μM        | 7.4 nM        | [5]              |
| Phosphorescence     | 20 nM ~ 0.8 μM        | 4.8 nM        | [6]              |
| Colorimetric        | 1.9 nM ~ 62.5 nM      | 0.13 nM       | [7]              |
| Colorimetric        | 1.0 nM ~ 28 nM        | 32 pM         | [8]              |
| Rayleigh Scattering | 50 pM ~ 500 nM        | 20 pM         | [9]              |
| Electrochemical     | 0 ~ 10 μM             | 227 pM        | [10]             |
| Electrochemical     | 10 pM ~ 100 μM        | 2.9 pM        | [11]             |
| <b>Fluorescence</b> | <b>10 pM ~ 1.0 μM</b> | <b>3.9 pM</b> | <b>This work</b> |

## References

- [1] W. Gu, X. Pei, Y. Cheng, C. Zhang, J. Zhang, Y. Yan, C. Ding, Y. Xian, Black Phosphorus Quantum Dots as the Ratiometric Fluorescence Probe for Trace Mercury Ion Detection Based on Inner Filter Effect, *ACS Sens.*, 2 (2017) 576-582.
- [2] M. Lan, J. Zhang, Y.S. Chui, P. Wang, X. Chen, C.S. Lee, H.L. Kwong, W. Zhang, Carbon nanoparticle-based ratiometric fluorescent sensor for detecting mercury ions in aqueous media and living cells, *ACS Appl. Mater. Interfaces*, 6 (2014) 21270-21278.
- [3] Y. Cai, F. Wang, Y. Hua, H. Liu, M. Yin, C. Zhang, Y. Zhang, H. Wang, A fluorimetric testing strip for the visual evaluation of mercury in blood using copper nanoclusters with DMSO-enhanced fluorescence and stability, *Nanoscale*, 12 (2020) 24079-24084.
- [4] Z. Q. Zhou, R. Yan, J. Zhao, L. Y. Yang, J. L. Chen, Y. J. Hu, F. L. Jiang, Y. Liu, Highly

- selective and sensitive detection of Hg<sup>2+</sup> based on fluorescence enhancement of Mn-doped ZnSe QDs by Hg<sup>2+</sup>-Mn<sup>2+</sup> replacement, *Sens. Actuator B-Chem.*, 254 (2018) 8-15.
- [5] S.M. Tawfik, A.A. Abd-Elaal, Y.I. Lee, Selective dual detection of Hg<sup>2+</sup> and TATP based on amphiphilic conjugated polythiophene-quantum dot hybrid materials, *Analyst*, 146 (2021) 2894-2901.
- [6] Y. Miao, X. Sun, J. Lv, G. Yan, Preparation of Single-Stranded DNA-Templated Room-Temperature Phosphorescent Quantum Dots and Their Application for Mercury(II) Detection in Environmental and Biological Fluids, *Anal. Chem.*, 91 (2019) 5036-5042.
- [7] Z. Deng, W. Jin, Q. Yin, J. Huang, Z. Huang, H. Fu, Y. Yuan, J. Zou, J. Nie, Y. Zhang, Ultrasensitive visual detection of Hg<sup>2+</sup> ions via the Tyndall effect of gold nanoparticles, *Chem. Commun.*, 57 (2021) 2613-2616.
- [8] J. Hai, F. Chen, J. Su, F. Xu, B. Wang, Porous Wood Members-Based Amplified Colorimetric Sensor for Hg<sup>2+</sup> Detection through Hg<sup>2+</sup>-Triggered Methylene Blue Reduction Reactions, *Anal. Chem.*, 90 (2018) 4909-4915.
- [9] W. Ren, Y. Zhang, H.G. Chen, Z.F. Gao, N.B. Li, H.Q. Luo, Ultrasensitive Label-Free Resonance Rayleigh Scattering Aptasensor for Hg<sup>2+</sup> Using Hg<sup>2+</sup>-Triggered Exonuclease III-Assisted Target Recycling and Growth of G-Wires for Signal Amplification, *Anal. Chem.*, 88 (2016) 1385-1390.
- [10] X. Song, Y. Wang, S. Liu, X. Zhang, H. Wang, J. Wang, J. Huang, Ultrasensitive electrochemical detection of Hg<sup>2+</sup> based on an Hg<sup>2+</sup>-triggered exonuclease III-assisted target recycling strategy, *Analyst*, 143 (2018) 5771-5778.
- [11] N. Ma, X. Ren, H. Wang, X. Kuang, D. Fan, D. Wu, Q. Wei, Ultrasensitive Controlled Release Aptasensor Using Thymine-Hg<sup>2+</sup>-Thymine Mismatch as a Molecular Switch for Hg<sup>2+</sup> Detection, *Anal. Chem.*, 92 (2020) 14069-14075.
